# Supplementary material
Source: publisher figshare collection journal article supplement (https://gsajournals.figshare.com/ndownloader/files/39530665)
Supplement: Supplementary file 1 [file 39530665]

	chr	cov	2cov	3cov	4cov	5cov	6cov	7cov	8cov	9cov	10cov	11cov	12cov	13cov	14cov	15cov	16cov	17cov	18cov	19cov	20cov	21cov	22cov	23cov	24cov	25cov	26cov	27cov	28cov	29cov	30cov	31cov	32cov	33cov	34cov	35cov	36cov	37cov	38cov	39cov	40cov	41cov	42cov	43cov	44cov	45cov	46cov	47cov	48cov
1	chr1	20.9761182442568	18.4874274989865	21.8639268951014	17.4771247804054	20.4792619572635	26.8014002064189	22.4313228055743	20.3573451555743	16.9856937282095	15.5340358712838	0	13.2227702719595	17.5774967724662	14.7813935040541	21.4860681435811	0	15.9758503402027	18.9422159989865	12.3427109592905	9.01011137297297	12.3520098206081	17.7263427881757	8.93640949932432	17.3413126226351	18.7614908978041	18.5904231119932	17.3415872684122	24.7389300856419	18.4141331125	25.9378649366554	18.3954256103041	23.7431592660473	19.8209759805743	18.3865976172297	13.4937514307432	8.61342623192568	25.3622784927365	17.1718334266892	4.75885168513514	12.746392464527	4.76632995016892	23.7211579961149	22.7280576511824	14.1200472204392	0.0239410233108108	15.6473842011824	10.2957352952703	0.0336189189189189
2	chr10	20.322941870354	21.0614465128319	17.8791510070796	17.1859466973451	17.6028396119469	26.3164626628319	18.6701980238938	19.9469211915929	15.7006980212389	14.2391617185841	0	12.273812949115	16.8729826048673	15.2981878884956	22.9326020115044	0	16.2803481146018	19.8869772420354	9.61873385929204	8.68068414646018	12.9519304247788	16.8475234862832	7.17293799424779	13.1729178659292	19.4875225539823	19.2764945274336	18.9434025610619	21.4678540030973	19.4837708022124	23.9912672106195	16.1513058123894	22.2824390336283	19.1680657265487	13.9942259876106	14.6909263168142	7.7859304340708	25.6743095884956	17.0804647539823	4.42311891371681	11.7761577880531	4.90888890221239	20.7650439075221	22.4490324495575	12.0363350566372	0.0225411504424779	18.7220830942478	8.65252676371681	0.0320650442477876
3	chr11	19.3652721907767	20.7760816995146	18.076126438835	18.6556488626214	18.9071833975728	25.7109107179612	21.5388337359223	20.6015815966019	16.196084007767	16.3509870160194	0	14.8500681218447	19.3190365626214	13.6910167490291	20.0008423553398	0	15.2186584339806	17.7954836097087	11.7170638616505	9.47728262524272	12.539277292233	17.0925392402913	8.4960634407767	15.3100172247573	17.1327980514563	19.3432628475728	16.5444165645631	25.9530314548544	20.490144207767	25.685188415534	17.7776652873786	20.0068533194175	18.4472904194175	14.8627730058252	14.6789656038835	7.75046782475728	25.0895109402913	17.340933338835	4.56390513398058	14.0236773218447	4.87721200485437	22.4114744014563	18.9848133708738	12.7204608131068	0.0221045427184466	16.3512279053398	10.3899778359223	0.0329988558252427
4	chr12	19.0629812596899	19.8164178651163	19.3167015418605	19.1230226751938	21.3641074806202	24.8311263325581	23.2590651527132	20.5985767302326	15.6111226790698	15.6058774124031	0	15.3199996565891	16.9574147527132	13.3076131790698	21.4695172232558	0	17.3017398922481	19.2175375542636	11.347312048062	9.0532263248062	13.0097806604651	17.6827530682171	8.38035995813953	14.5098504031008	18.6068714658915	20.5354314844961	18.5919172565891	25.4351537379845	18.5472751751938	26.9914894062016	18.7163780604651	22.2936387178295	20.0002190395349	15.9982389852713	15.6156864193798	8.17552242093023	25.0228297434109	18.719830124031	4.35494659224806	14.1365247162791	5.0489579	23.553971675969	19.3095428294574	12.8485266333333	0.0237897751937984	15.9656555581395	10.4092851992248	0.0318255813953488
5	chr2	21.475578302139	20.2042448465241	18.5954158527629	16.8986393672014	21.7105636625668	23.0300152561497	18.8322546365419	20.1525001655971	15.2693394561497	14.5461842939394	0	13.4582677354724	18.0369979789661	16.8152454285205	18.1125568641711	0	16.217039343672	20.2159490647059	11.3876513081996	8.99262683315508	13.0946629527629	16.7162409292335	8.59171682727273	14.7164972174688	18.1527217707665	18.6062621903743	16.9416931349376	23.7951609163993	19.0097248903743	23.8872761319073	16.9673501096257	20.7093900821747	18.3051760160428	16.0540268511586	13.8242005304813	8.26670824331551	24.9875034146168	18.1145273620321	4.46147061105169	12.8155153664884	4.64893178146168	22.0156474730838	20.7917436782531	12.791539528164	0.0275752228163993	17.4422910566845	9.98589440998217	0.0329627770053476
6	chr3	20.1805106919386	19.2775568028791	18.9696162119002	20.2320741001919	20.3461079641075	25.4245740679463	19.7864053024952	20.6710434047985	15.4174088980806	15.6120634364683	0	14.6180785099808	17.6581908836852	15.8266980527831	20.673645015547	0	15.9293733504798	18.4234598754319	12.1881500059501	10.1994557646833	12.9937331673704	18.5645164128599	8.54676401765835	17.2745101170825	19.0186029715931	19.3257662642994	17.509597356238	25.7252227850288	19.9933187525912	27.0125407119002	20.3036728439539	21.0634676802303	21.0247932049904	16.4601013230326	14.358619190595	7.6469697815739	25.9577637777351	19.1802791149712	4.69688872667946	14.419525059501	5.29944043205374	22.4114990485605	21.7066180349328	13.4566871852207	0.024209980806142	19.0636296715931	11.3106616176583	0.039573320537428
7	chr4	17.5430535182628	17.3052018982183	20.3189324908686	18.5215140964365	21.9895280530067	19.9063665915367	19.8797184334076	19.2471134164811	15.1865287514477	12.282851485078	0	14.9474825167038	15.9501352926503	13.5674680253898	17.4002844957684	0	14.3322387200445	17.194315292873	12.5245253227171	7.57917935657016	12.5643139826281	16.8383258750557	6.80491470846325	13.6039683485523	18.7891987048998	18.9910400363029	14.8712043634744	19.6708612365256	15.4567996752784	28.9034763389755	15.9856477636971	21.8788052498886	15.6990186017817	18.2310462358575	12.2001953173719	6.7819139389755	22.5836519258352	16.1283957492205	4.44210905924276	10.9878864799555	4.68413968418708	19.1969741570156	20.4581065187082	12.2713213258352	0.0206015420935412	18.7038433523385	10.0972913610245	0.0392640033407572
8	chr5	21.9000658799087	20.3278820851598	19.6659905445205	19.5958892961187	21.5024294374429	25.8014534321918	22.3376868143836	22.064146566895	15.2499867949772	15.8746951808219	0	14.7925520607306	19.1435759116438	14.8763675680365	20.1500004141553	0	16.6477251769406	19.3263391627854	11.2299072031963	9.76006075	13.408156653653	17.2832679077626	8.35524906917808	15.556606083105	18.7434189369863	19.3784307956621	17.3373515849315	27.2889449929224	19.7905387488584	26.8479691438356	20.2811359319635	22.8318475212329	20.2036886159817	17.2726381972603	14.7933657063927	8.95689611666667	27.981512426484	19.1091913226027	4.369462643379	14.9596991280822	5.26040718127854	22.5874345207763	20.4576853614155	13.4412762308219	0.0250482945205479	18.5384890114155	10.4250413317352	0.0369356894977169
9	chr6	16.948658614759	16.9256397909639	14.8389345325301	15.3564887126506	21.0097666310241	18.6514200746988	19.5336776713855	15.2751132075301	13.499350176506	15.3522719171687	0	11.2566895337349	14.5919717548193	16.5102348322289	24.0376527879518	0	12.8492776536145	15.4629533295181	11.2754261885542	7.40848985963855	10.8503369635542	13.6216782412651	6.82281314668675	13.0149081168675	19.3207207927711	19.8301499786145	13.4069623596386	20.2557577454819	14.8395972915663	26.7683895213855	16.1366974906627	17.5802836948795	15.6271393256024	13.12441025	12.0742489009036	6.19111322198795	19.7489752349398	15.1219064650602	3.53495249337349	10.4935079722892	4.55519727138554	18.1020335228916	16.0576877259036	10.6798258873494	0.0219087090361446	13.166240811747	8.12087175150602	0.0308809981927711
10	chr7	20.7311147640244	20.488054945122	20.3980684881098	19.7266420530488	21.606383570122	25.199483879878	20.610778275	20.0888556847561	14.8347243021341	17.0619863896341	0	14.2360110277439	18.6274818185976	15.0281457271341	21.6051012875	0	16.1898167582317	18.8274836216463	11.8250893204268	9.01052018353658	13.3094684887195	17.5074680753049	8.75233640914634	15.2987638557927	17.6627150003049	20.1416147685976	16.9189801615854	26.1038547216463	20.6954960783537	26.8380383176829	18.6245977603659	22.7708895722561	19.1856787457317	17.2570563454268	15.1436017628049	7.77980517012195	26.4590086493902	19.9407839728659	4.56557040609756	13.9759736426829	5.2501238777439	22.0333515685976	22.9806845545732	13.0001733277439	0.0272926829268293	17.9358373146341	10.7498395804878	0.0365904728658537
11	chr8	21.2157212769531	22.20026190625	18.8463578699219	19.4649935308594	20.7593386707031	24.4266498925781	21.1542353832031	19.2881105941406	14.0761612027344	15.862337396875	0	13.6741199664063	17.7080144566406	16.4547589679688	22.1510463210938	0	17.2637565054687	19.27126438125	11.6137646851562	8.7147336109375	13.1197183636719	26.0972982199219	8.79578869648437	18.0133028660156	18.1187565609375	20.8275531375	16.0036729722656	26.0124749238281	20.7255480195312	27.3253870683594	19.954033715625	20.9427209273437	19.0566259441406	16.291686815625	15.05740186875	8.29161573476562	24.1638625753906	17.912519284375	4.16953930429688	13.5229166839844	4.68547241679688	22.0579259734375	20.9005544054687	12.3401079230469	0.026163671875	18.6133755582031	10.2554692894531	0.03417890625
12	chr9	18.8659091218487	19.8348132096639	17.6240185079832	18.5170455268908	18.7295711714286	22.2061886369748	21.5732966260504	18.6009754092437	14.2953155134454	15.5987968176471	0	14.2207167659664	16.3635019659664	15.9347815760504	20.6144943815126	0	16.1229777567227	19.4612685773109	11.2611194432773	9.16597862478992	13.8621590298319	17.4516744315126	7.91737098655462	14.257208915126	17.8154260302521	19.1469315294118	18.4706802714286	26.9290570596639	18.2859766386555	24.4130888579832	17.4889207306723	22.9776199693277	19.02677885	16.3919934865546	14.4524568361345	7.58849643193277	24.3751346701681	17.1892752205882	4.52995778193277	14.0962722340336	5.36024195882353	23.9455331764706	22.6790661878151	12.6180507752101	0.0247067226890756	17.2910283084034	10.3769589592437	0.0372617647058824
[truncated: 65 more columns]
